# Supplementary material
Source: PubMed Central journal article supplement (PMC5747964)
Supplement: NIHMS917057-supplement-Supplemental_Information_Guide.pdf [file NIHMS917057-supplement-Supplemental_Information_Guide.pdf]

## Supplementary Information Guide

SI Table 1. Summary of PageRank scores and gene-expression.

This is a PDF summarizing data in Fig. 1f and Extended Data Fig. 2b.

SI Table 2. Summary of *in vivo* RNAi screen.

This is a PDF including the average z-score and hairpin sequence of all shRNA constructs included in the RNAi screen.

SI Table 3. Core Trm signature and core circulating signature genes.

This is a PDF including the entire gene list for the core tissue-residency signature and the core circulating signature used in Fig. 3c and Fig. 4a,e.
